# Supplementary material
Source: PubMed Central journal article supplement (PMC3928673)
Supplement: NIHMS542773-supplement-Supplement1.pdf [file NIHMS542773-supplement-Supplement1.pdf]

## Supplementary Appendix

This appendix has been provided by the authors to give readers additional information about their work.

Supplement to: Gordon D, Taddei-Peters W, Mascette A, Antman M, Kaufmann PG, Lauer MS. Publication of trials funded by the National Heart, Lung, and Blood Institute. *N Engl J Med* 2013;369:1926-34. DOI: 10.1056/NEJMsa1300237

## Supplementary Materials

Number of pages: 5

Table of contents:

|                        |           |
|------------------------|-----------|
| List of investigators: | Page 1    |
| Supplementary Figures: | Pages 2-4 |
| Supplementary Table:   | Page 5    |

List of investigators:

David Gordon MD PhD\*, Wendy Taddei-Peters PhD, Alice Mascette MD, Melissa Antman PhD, Peter G. Kaufmann PhD, and Michael S. Lauer MD\*\*

From the \*Office of Special Projects, Division of Cardiovascular Sciences and the \*Office of the Director, Division of Cardiovascular Sciences, both of the National Heart, Lung, and Blood Institute (NHLBI) in Bethesda, MD

Figure S1: Random survival forest plots showing ensemble estimators of likelihood of earlier publication as a function of budget. The right panel shows "partial" values as explained in <http://cran.r-project.org/web/packages/randomSurvivalForest/randomSurvivalForest.pdf>, page 15.

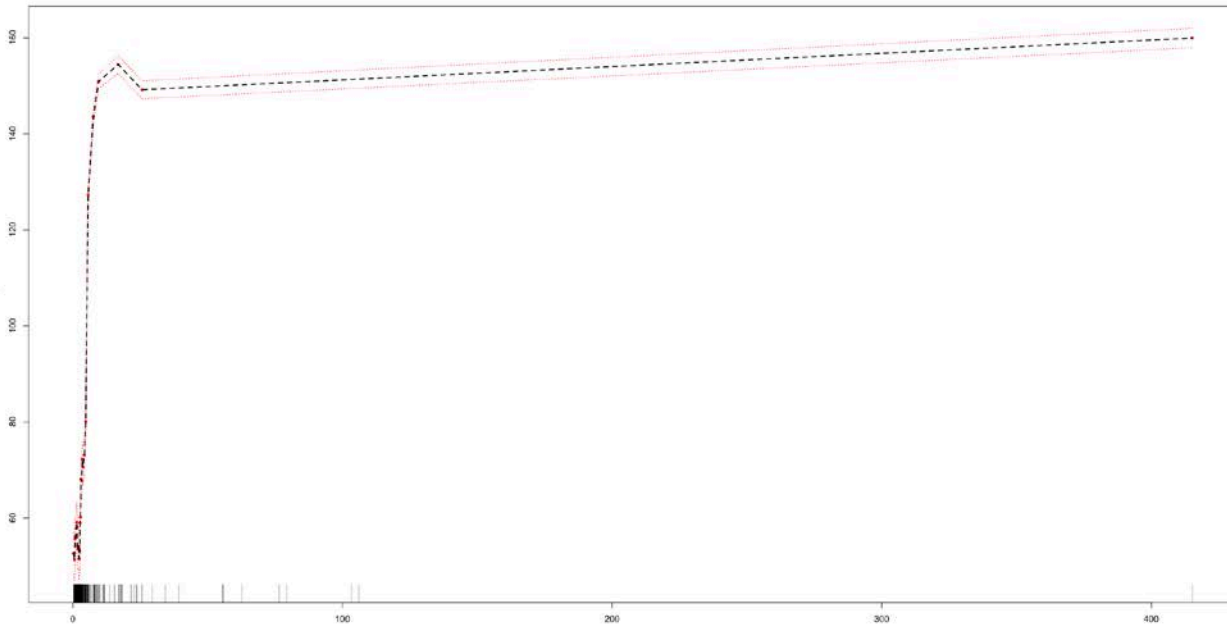

Budget (\$Million)

Figure S2: Citation rates according to trial characteristics. Panel A (upper) uses time of trial publication as time zero and considers only published trials, whereas Panel B (lower) uses time of trial completion and considers all trials, counting every year between completion and publication as a year with no citations. By definition, unpublished trials cannot be cited; we did not include citations to abstracts of meeting presentations. Note that the number of trials in the denominator decreases over time; the shape of the curve therefore does not reflect the trajectory of citations within a single “average” trial.

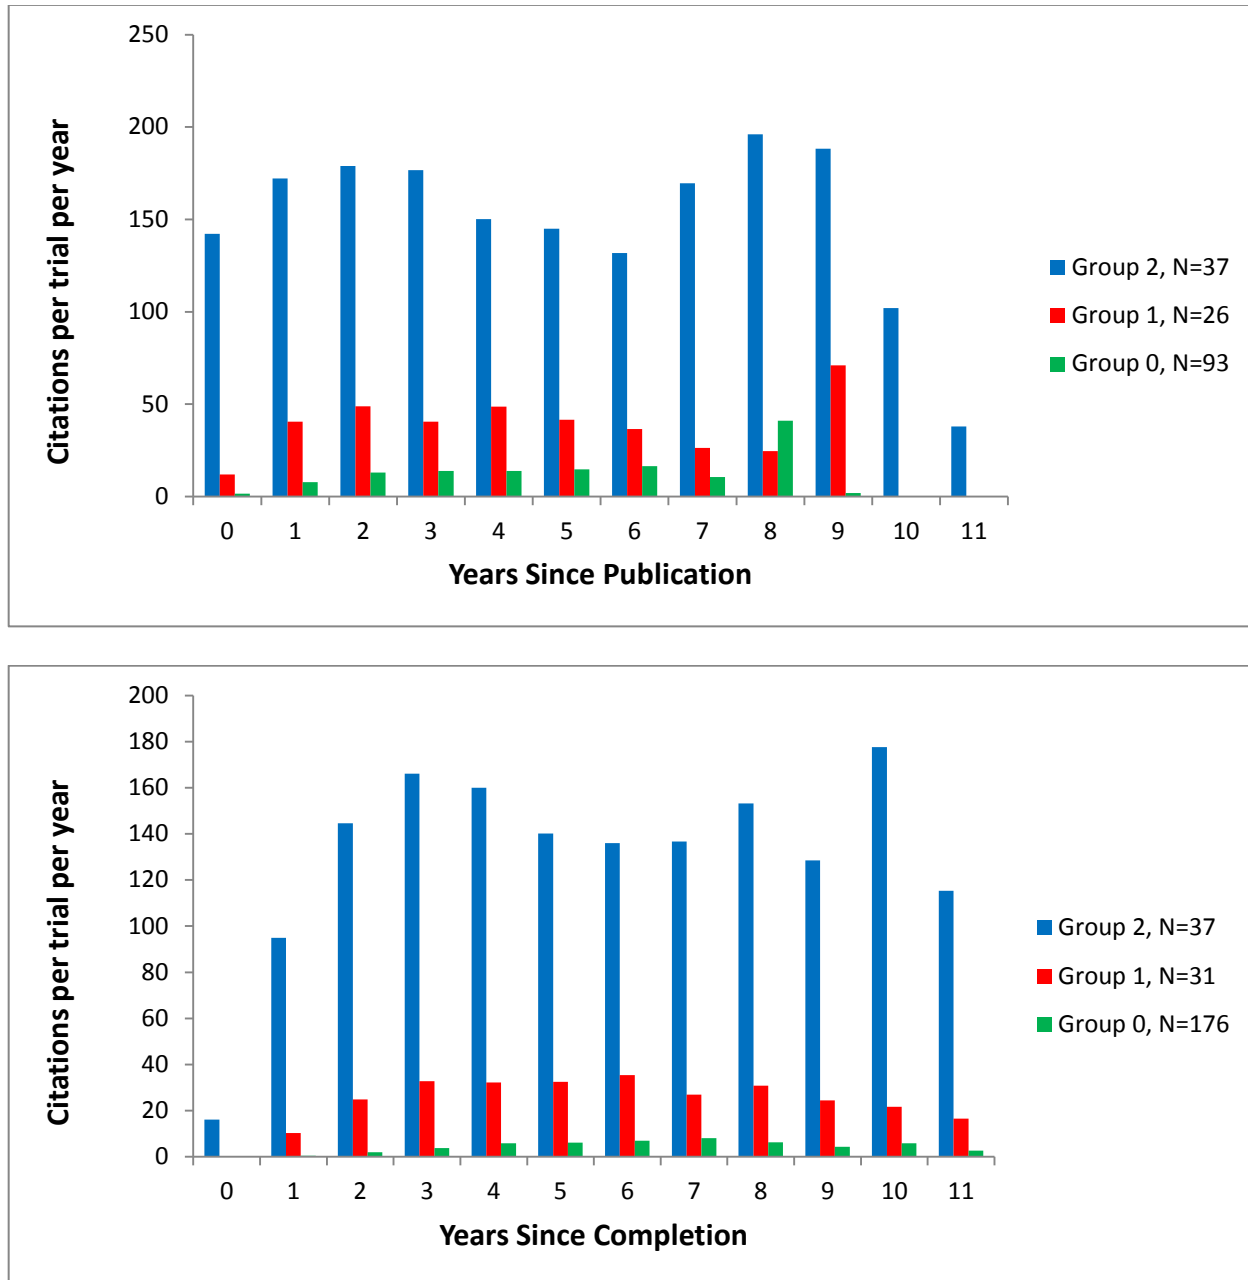

Group 2: Trials used clinical event as primary endpoint and cost  $\geq$  \$5 M.  
 Group 1: Trials used clinical event as primary endpoint or cost  $\geq$  \$5 M, but not both.  
 Group 0: Trials did not use clinical event as primary endpoint and cost  $<$  \$5 M.

Figure S3: Kaplan-Meier estimators of time to publication for trials supported by grants which scored better or worse during peer review prior to funding. The 20 trials that were supported by contracts are not included since they are reviewed differently. We employed a composite 2-tiered peer review scoring metric, in which grants with percentile scores  $\leq 12$  or (if not assigned a percentile) with priority scores  $< 170$  (or  $< 20$  under the post-2009 system) were classified in the top tier.

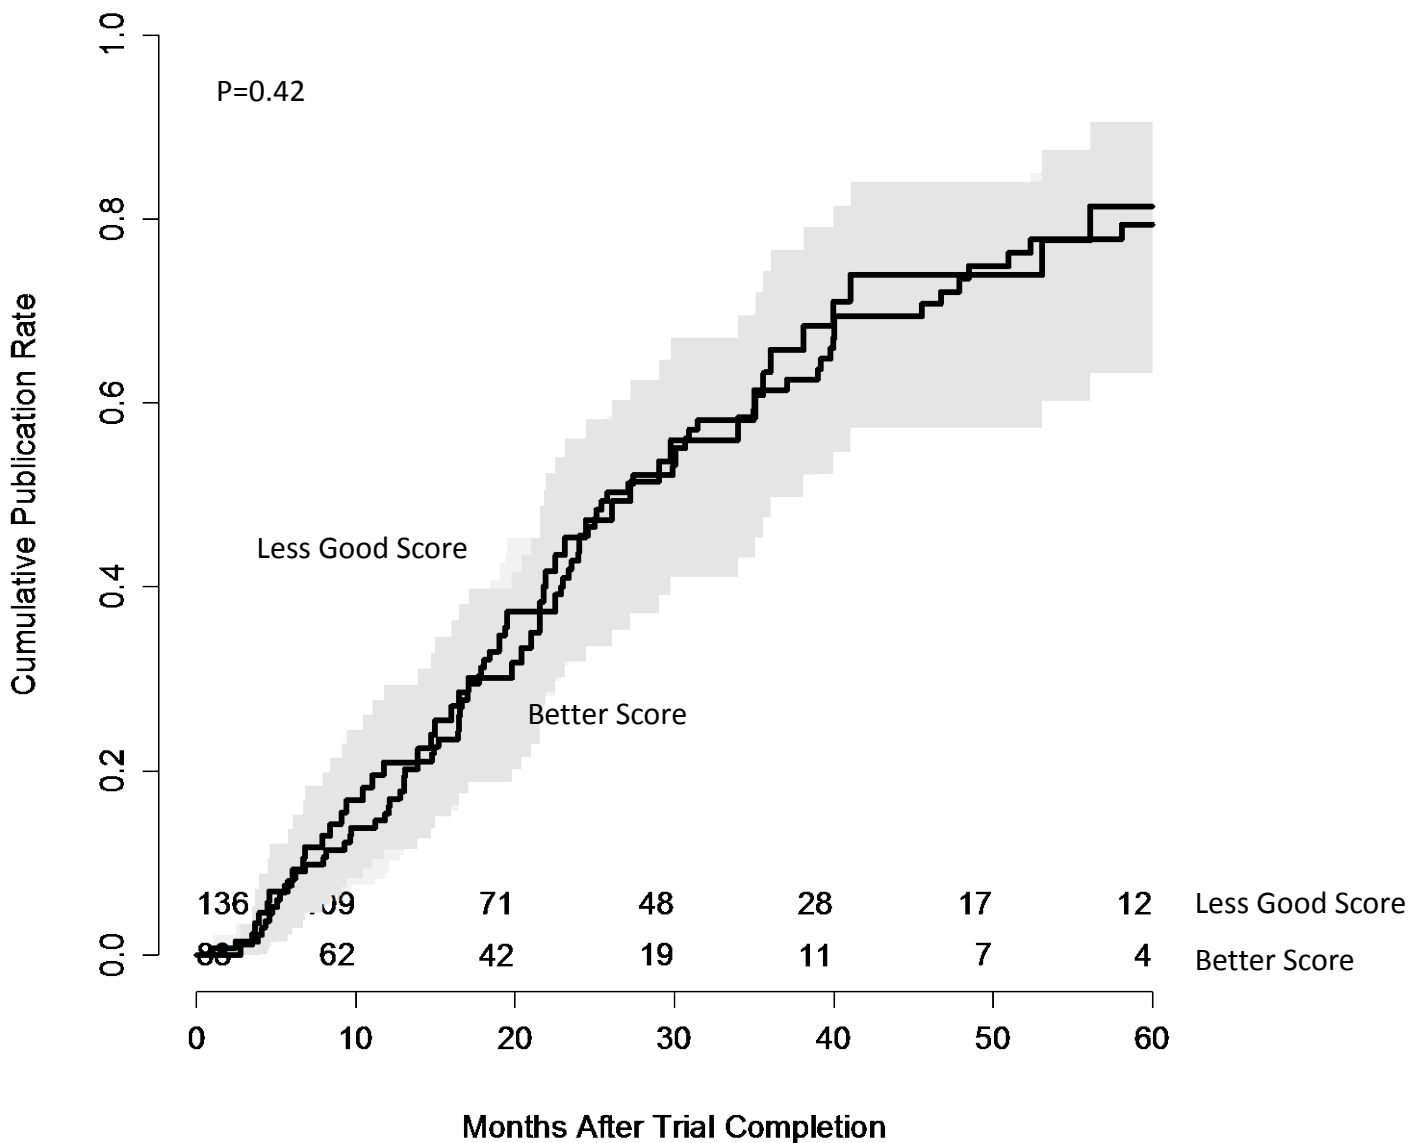

Table S1: Trials Averaging More than 40 Citations per Year from Publication Date through 2012

|    | Trial Acronym   | Clinical Endpoint | Cost > \$5M | Positive Outcome | Date Completed | Date Published | Journal      | Citations Per Year |
|----|-----------------|-------------------|-------------|------------------|----------------|----------------|--------------|--------------------|
| 1  | WHI-EP          | Yes               | Yes         | No               | 31-May-02      | 17-Jul-02      | JAMA         | 812.5              |
| 2  | ACCORD Diabetes | Yes               | Yes         | No               | 06-Feb-08      | 06-Jun-08*     | N Engl J Med | 469.8              |
| 3  | ALLHAT-BP       | Yes               | Yes         | No               | 31-Mar-02      | 18-Dec-02      | JAMA         | 304.1              |
| 4  | SCD-HeFT        | Yes               | Yes         | Yes              | 31-Oct-03      | 20-Jan-05      | N Engl J Med | 290.1              |
| 5  | WHI-E           | Yes               | Yes         | No               | 29-Feb-04      | 14-Apr-04      | JAMA         | 271.3              |
| 6  | ACCORD BP       | Yes               | Yes         | No               | 30-Jun-09      | 14-Mar-10*     | N Engl J Med | 207.9              |
| 7  | AFFIRM          | Yes               | Yes         | No               | 01-Oct-01      | 05-Dec-02      | N Engl J Med | 201.0              |
| 8  | ACCORD Lipid    | Yes               | Yes         | No               | 30-Jun-09      | 14-Mar-10*     | N Engl J Med | 179.0              |
| 9  | REMATCH         | Yes               | Yes         | Yes              | 27-Jul-01      | 15-Nov-01      | N Engl J Med | 130.2              |
| 10 | WHS ASA         | Yes               | Yes         | No               | 31-Mar-04      | 07-Mar-05*     | N Engl J Med | 120.4              |
| 11 | AIM-HIGH        | Yes               | Yes         | No               | 31-May-11      | 15-Nov-11*     | N Engl J Med | 112.8              |
| 12 | BARI 2D         | Yes               | Yes         | No               | 30-Nov-08      | 07-Jun-09*     | N Engl J Med | 108.3              |
| 13 | POUNDS Lost**   | No                | Yes         | No               | 01-Dec-07      | 26-Feb-09      | N Engl J Med | 96.6               |
| 14 | WHI CD          | Yes               | Yes         | No               | 31-Mar-05      | 16-Feb-06      | N Engl J Med | 95.8               |
| 15 | ALLHAT-Dox      | Yes               | Yes         | No               | 31-Jan-00      | 19-Apr-00      | JAMA         | 78.9               |
| 16 | ENRICHD**       | Yes               | Yes         | No               | 30-Apr-01      | 01-Jun-03      | JAMA         | 78.5               |
| 17 | PEACE           | Yes               | Yes         | No               | 01-Dec-03      | 07-Nov-04*     | N Engl J Med | 77.3               |
| 18 | ACCORD Eye      | No                | Yes         | Yes              | 01-Dec-09      | 29-Jun-10*     | N Engl J Med | 74.2               |
| 19 | HF-ACTION**     | Yes               | Yes         | No               | 15-Mar-08      | 08-Apr-09      | JAMA         | 72.9               |
| 20 | CADUCEUS        | Yes               | Yes         | Yes              | 16-Jun-11      | 14-Feb-12*     | Lancet       | 70.7               |
| 21 | ALLHAT-LLT      | Yes               | Yes         | No               | 31-Mar-02      | 18-Dec-02      | JAMA         | 68.4               |
| 22 | STICH-CABG      | Yes               | Yes         | No               | 01-Nov-10      | 04-Apr-11*     | N Engl J Med | 68.3               |
| 23 | TELE-HF         | Yes               | Yes         | No               | 30-Jun-10      | 16-Nov-10      | N Engl J Med | 62.2               |
| 24 | WHS E           | Yes               | Yes         | No               | 31-Mar-04      | 06-Jul-05      | JAMA         | 60.1               |
| 25 | PAD             | Yes               | Yes         | Yes              | 30-Sep-03      | 12-Aug-04      | N Engl J Med | 54.9               |
| 26 | PREVENT         | Yes               | No          | Yes              | 01-Dec-02      | 24-Feb-03*     | N Engl J Med | 54.2               |
| 27 | WHI DM**        | Yes               | Yes         | No               | 31-Mar-05      | 08-Feb-06      | JAMA         | 53.7               |
| 28 | PREMIER**       | No                | Yes         | Yes              | 30-Nov-02      | 23-Apr-03      | JAMA         | 53.5               |
| 29 | ESCAPE          | Yes               | No          | No               | 17-Nov-03      | 05-Oct-05      | JAMA         | 52.5               |
| 30 | OAT             | Yes               | Yes         | No               | 31-Dec-05      | 14-Nov-06*     | N Engl J Med | 48.0               |
| 31 | OmniHeart**     | No                | Yes         | Yes              | 30-Jun-05      | 16-Nov-05      | JAMA         | 43.0               |

\* Online publication date

\*\* Behavioral intervention

BLANK PAGE
